# Supplementary material
Source: publisher figshare collection journal article supplement (https://acs.figshare.com/ndownloader/files/5091703)
Supplement: Supplementary file 1 [file 5091703]

**Supporting Information Available:** Validation data of LC/MS/MS methods used for quantitative analysis of ZP-CoA, ZP-Gly and ZP-Tau.

### **ZP-CoA**

Calibration curves consisted of five calibration standards (n=3 at each level) and the correlation coefficients ( $r^2$ ) were at least 0.990. The limit of quantification of this method was 0.01  $\mu\text{M}$  and the repeatability, measured as the relative standard deviation of ZP-CoA dissolved in sample matrix (0.050  $\mu\text{M}$ , n=6), was 6.6% (hepatocyte suspension) and 4.3% (liver homogenate). To assess the effect of matrix on the accuracy of rat livers analysis, ZP-CoA was dissolved in water (n=6, RSD was 9.1%) and to sample matrix (see above), and a comparison showed that the ion suppression, expressed as the ratio of: (the mean of the signal in matrix) / (the mean of the signal in water), was 1.01.

### **ZP-Gly and ZP-Tau**

All calibration curves consisted of five standards and correlation coefficients ( $r^2$ ) were at least 0.990. The quantification limits for ZP-Tau and ZP-Gly was 0.070  $\mu\text{M}$  and 0.010  $\mu\text{M}$ , respectively. The repeatability for ZP-Tau was 10.1% in hepatocyte suspension (0.63  $\mu\text{M}$ , n=6) and 10.2% in rat livers (0.12  $\mu\text{M}$ , n=6). The repeatability for ZP-Gly was 12.5% in hepatocyte suspension (0.020  $\mu\text{M}$ , n=8) and 11.4% for analysis of rat livers (0.067  $\mu\text{M}$ , n=6). The matrix effect was investigated in liver homogenates as described for ZP-CoA and was determined to 1.02 (ZP-Tau) and 1.32 (ZP-Gly).
